# Supplementary material
Source: Springer Nature journal article supplement (https://www.springermedizin.de/resource/supplementary/12960_2014_441_MOESM4_ESM.pdf/9570092)

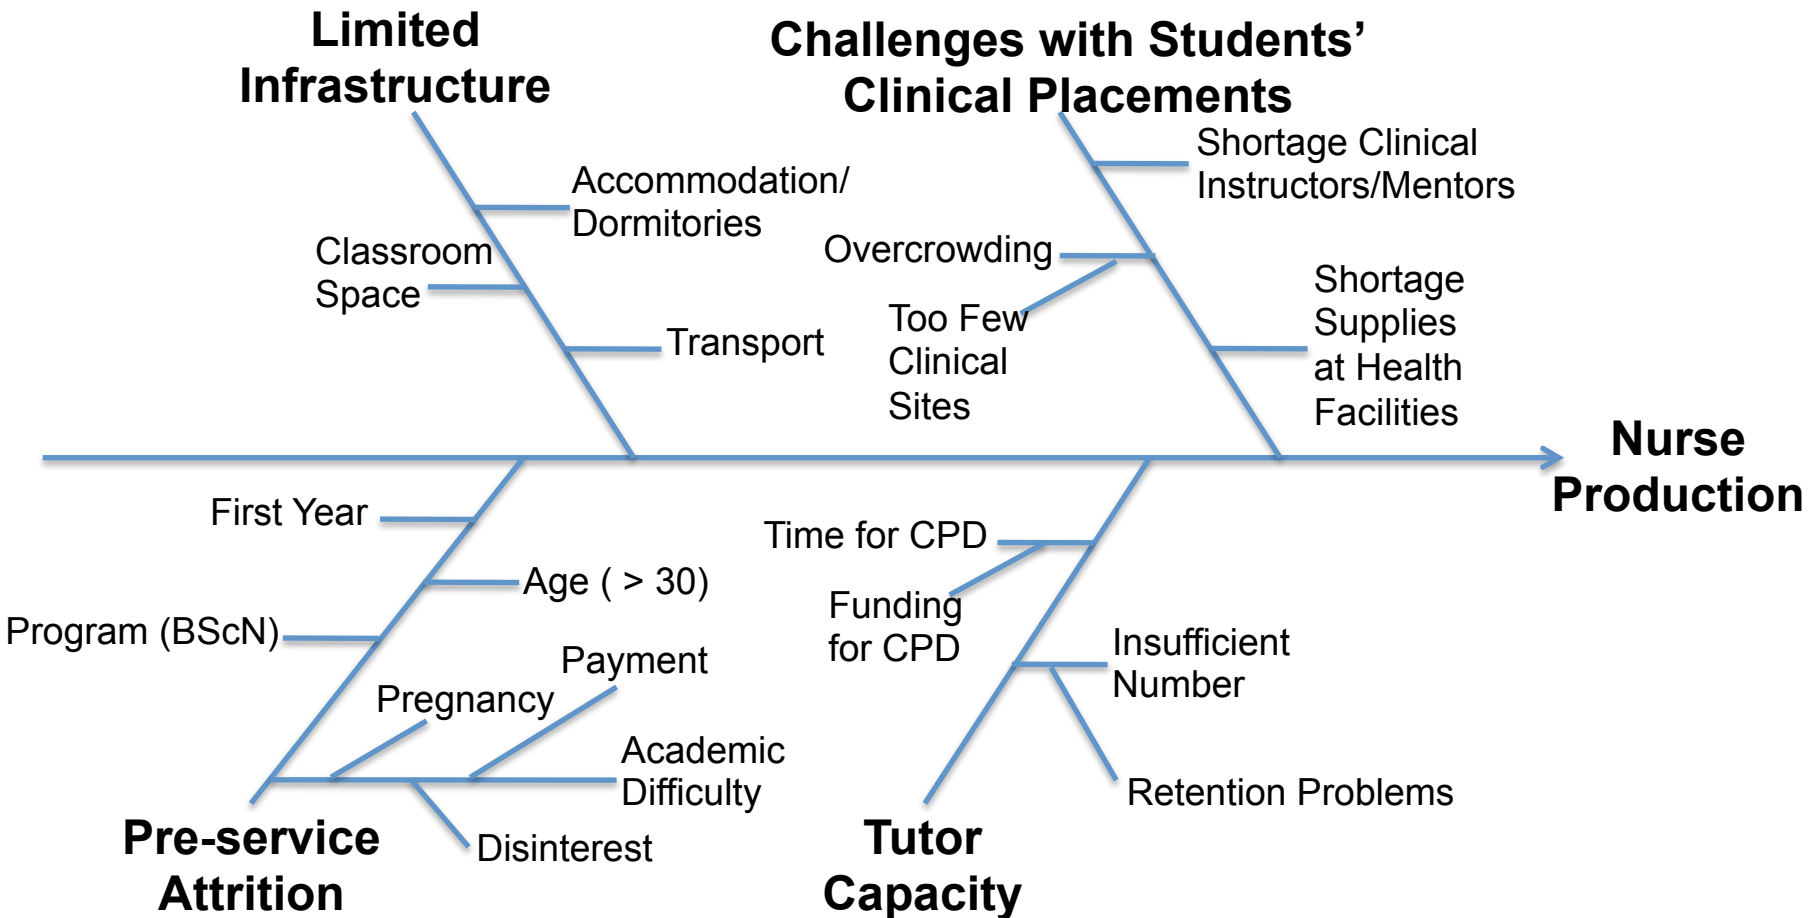

Supplement: MOESM4 [file 9570092]
